# Supplementary figures and images for: Validation of a new serum granulocyte–macrophage colony-stimulating factor autoantibody testing kit
Source: PubMed Central journal article supplement — ERJ Open Res. 2020 Jan 27;6(1):00259-2019. doi: 10.1183/23120541.00259-2019 (PMC6983497; doi:10.1183/23120541.00259-2019), 2020-01-27

# Supplemental Figure 1

A

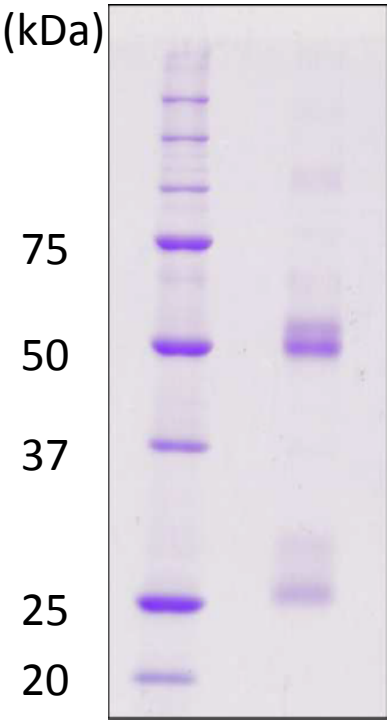

B

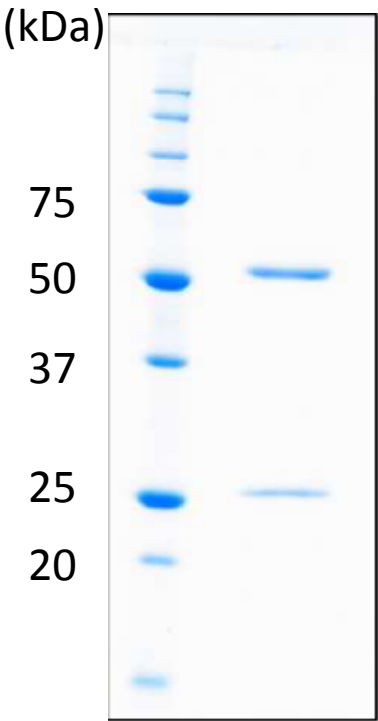

C

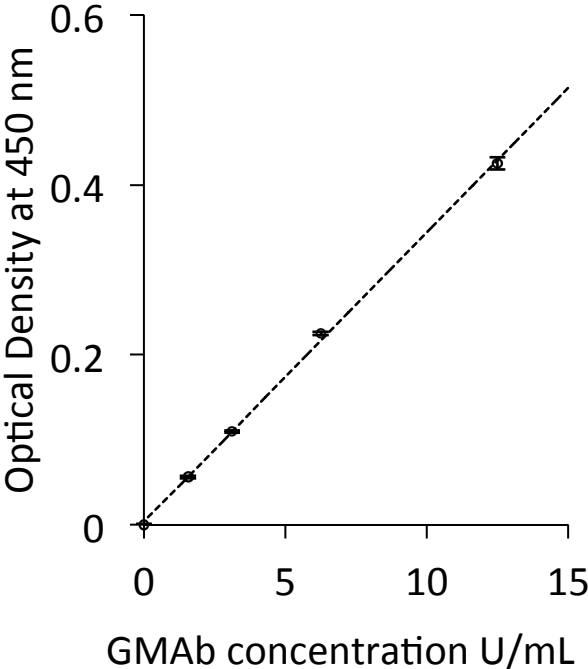

D

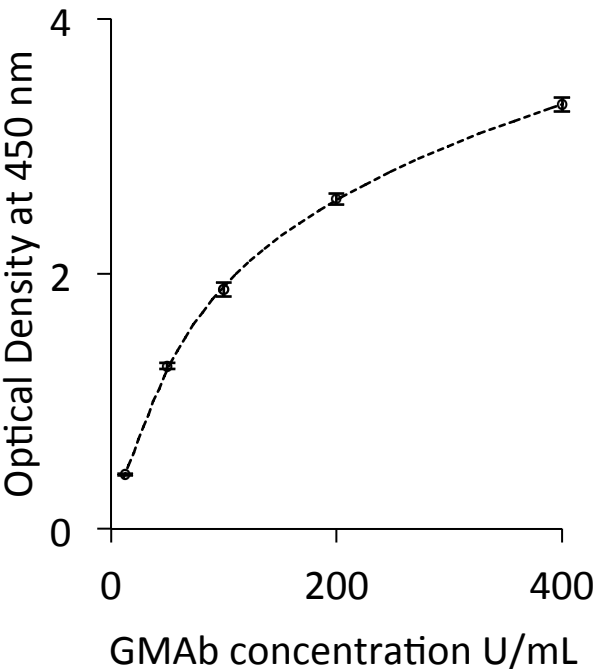

Supplement: 00259-2019.figureS1.pdf [file 00259-2019.figureS1.pdf]

# Supplemental Figure 2

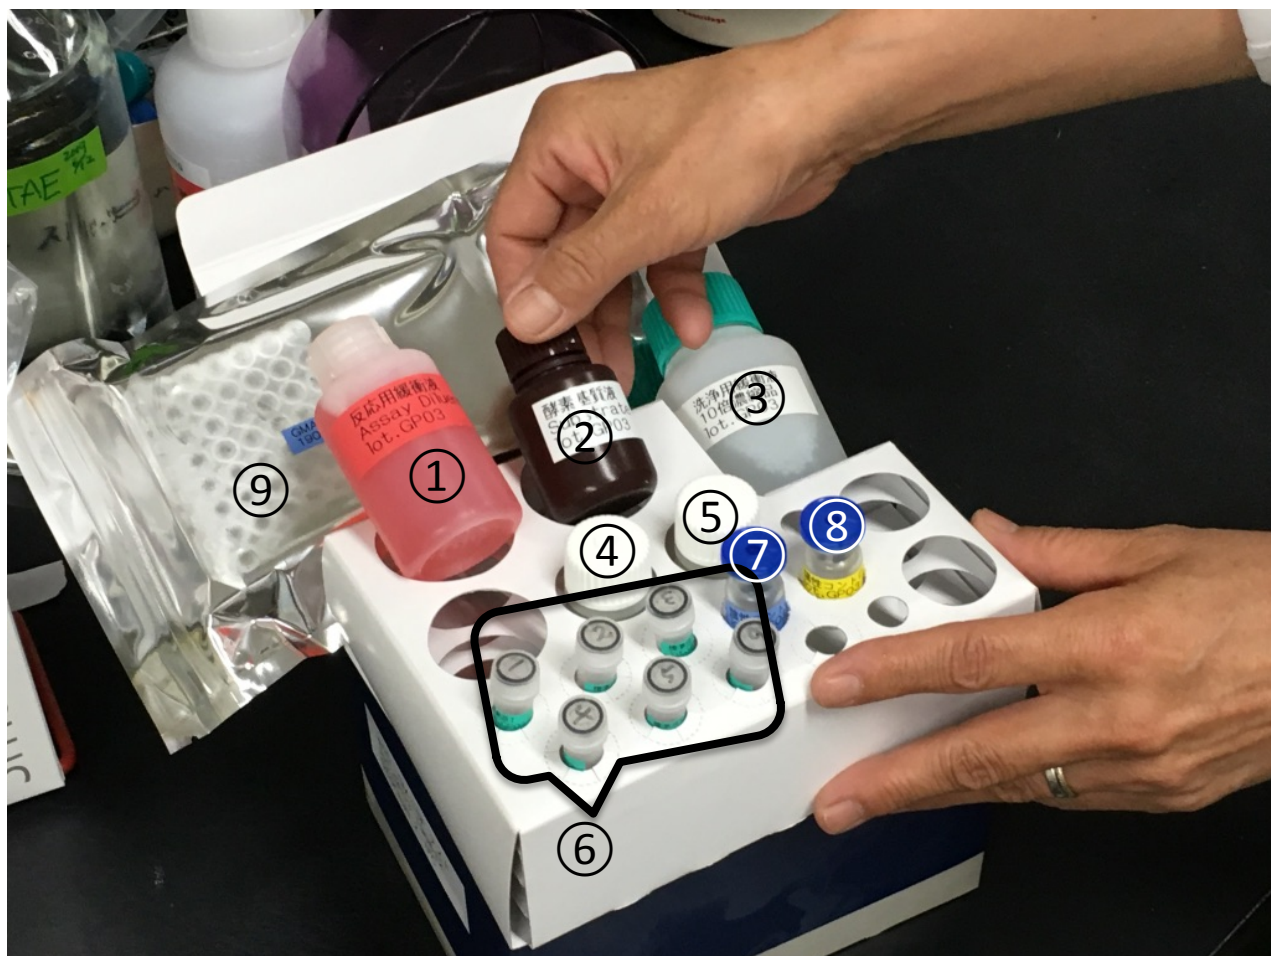

Supplement: 00259-2019.figureS2.pdf [file 00259-2019.figureS2.pdf]

# Supplemental Figure 3

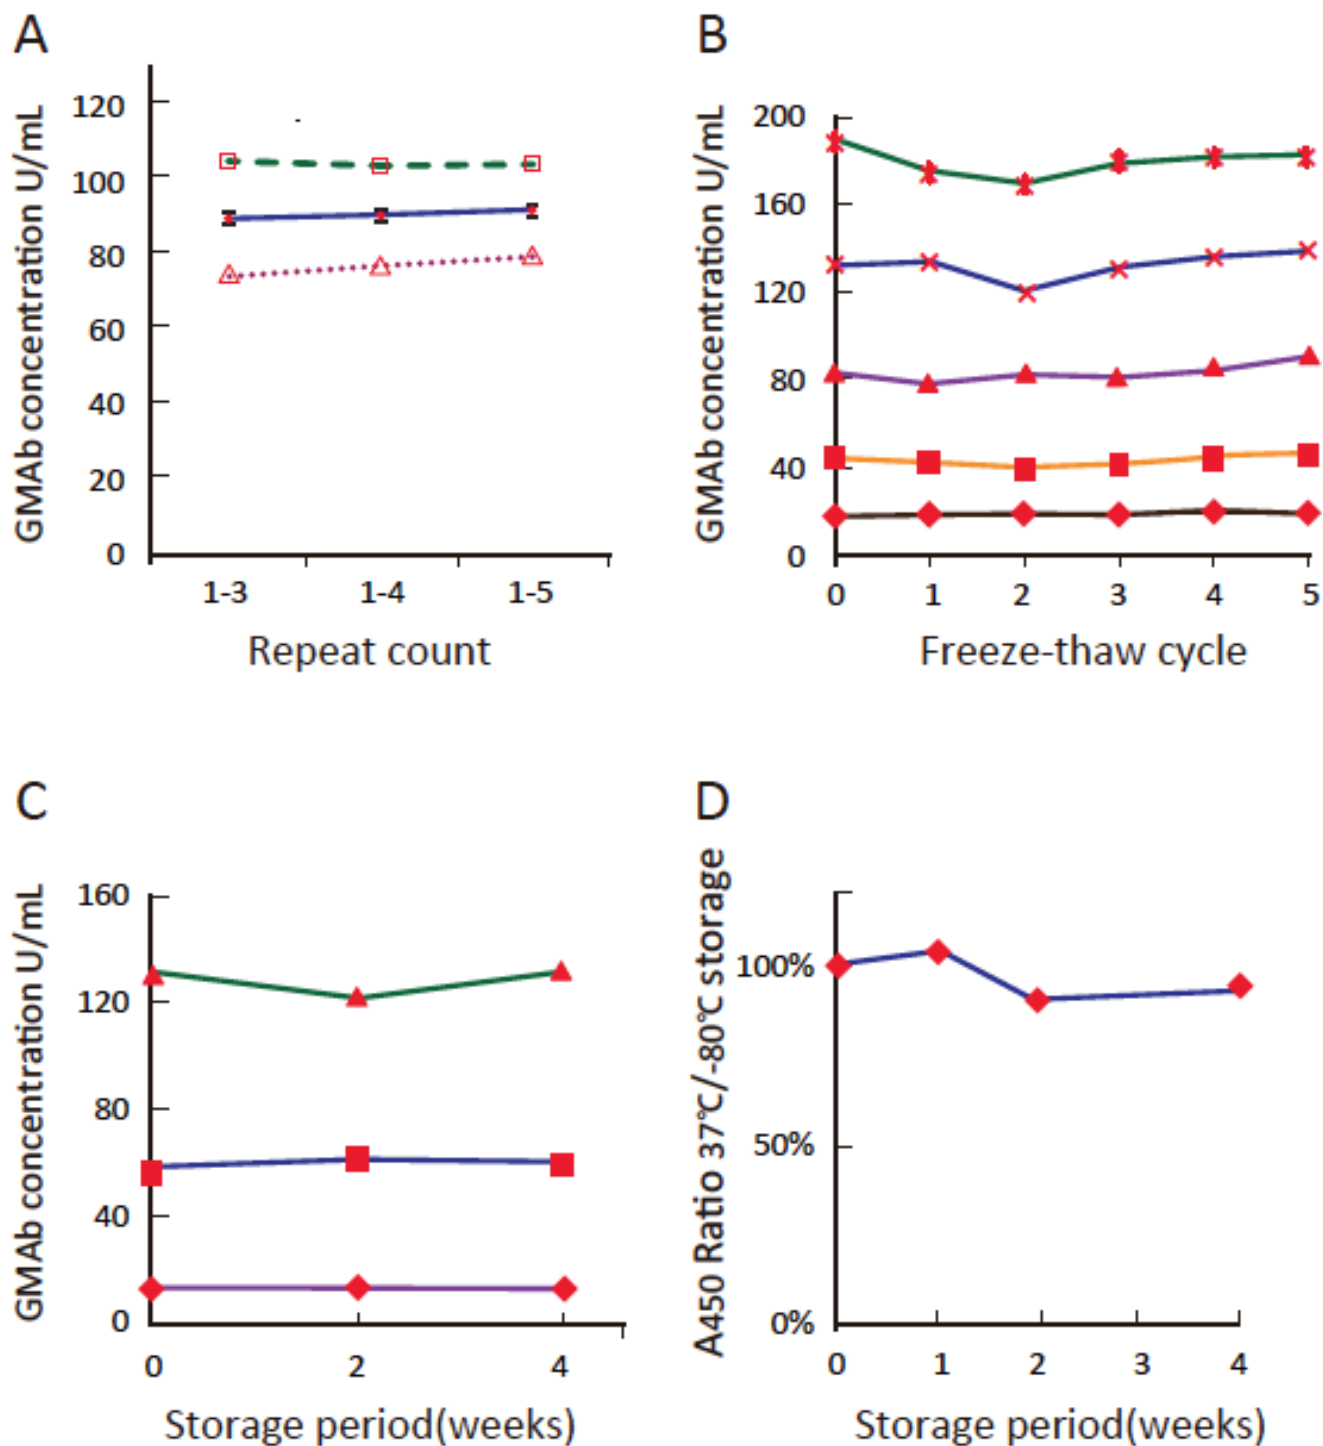

Supplement: 00259-2019.figureS3.pdf [file 00259-2019.figureS3.pdf]

# Supplemental Figure 4

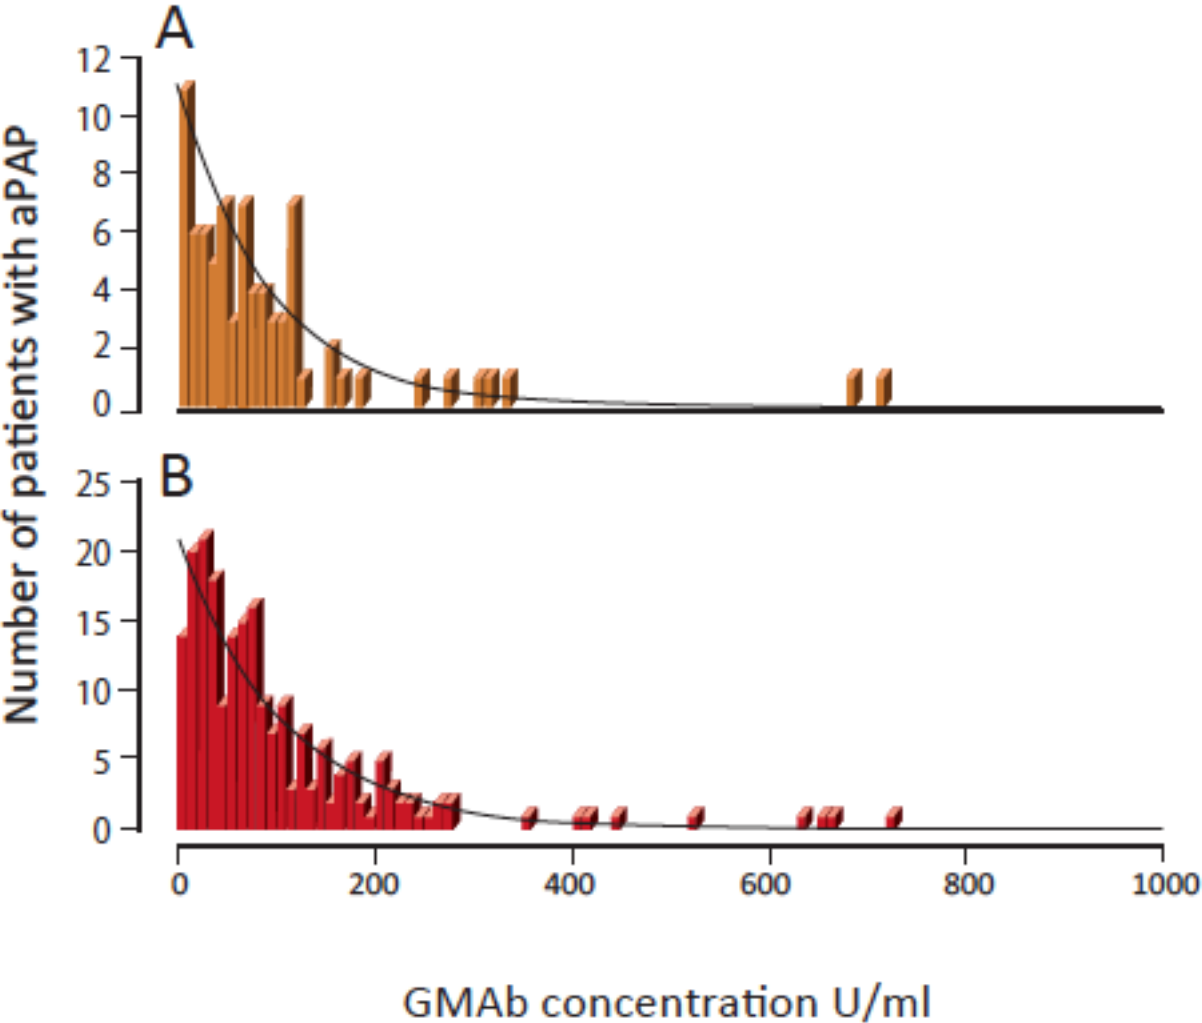

Supplement: 00259-2019.figureS4.pdf [file 00259-2019.figureS4.pdf]

# Supplemental Figure 5

Case1

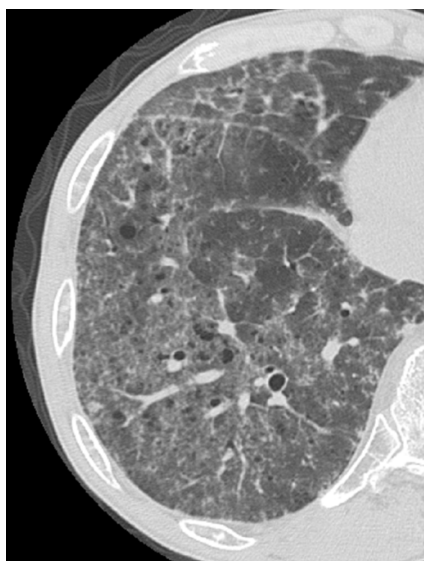

Case2

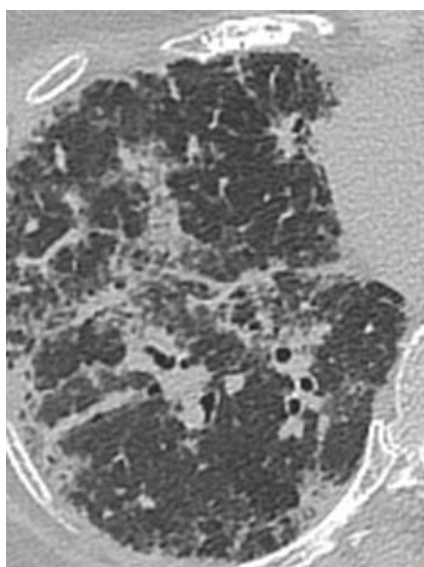

Case3

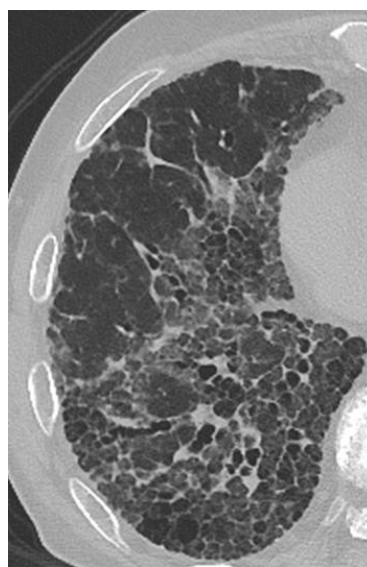

Case4

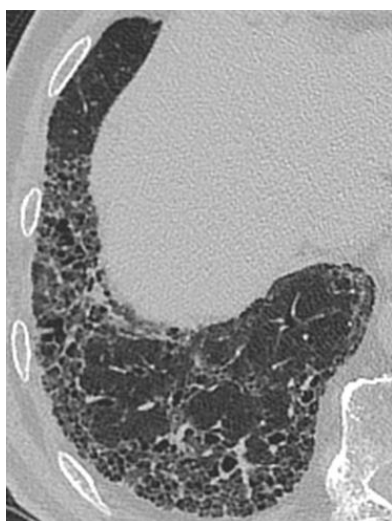

Case5

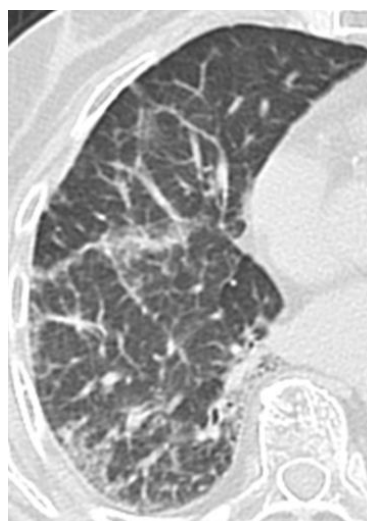

Supplement: 00259-2019.figureS5.pdf [file 00259-2019.figureS5.pdf]
